# Supplementary material
Source: Springer Nature journal article supplement (https://www.springermedizin.de/resource/supplementary/12943_2011_988_MOESM7_ESM.pdf/9552146)

**A**

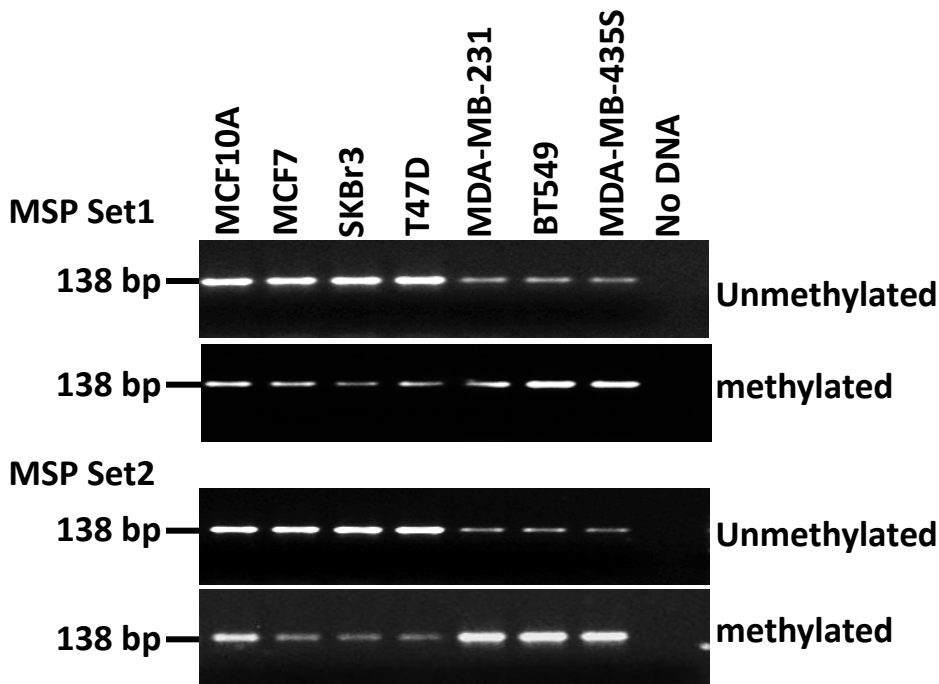

**B**

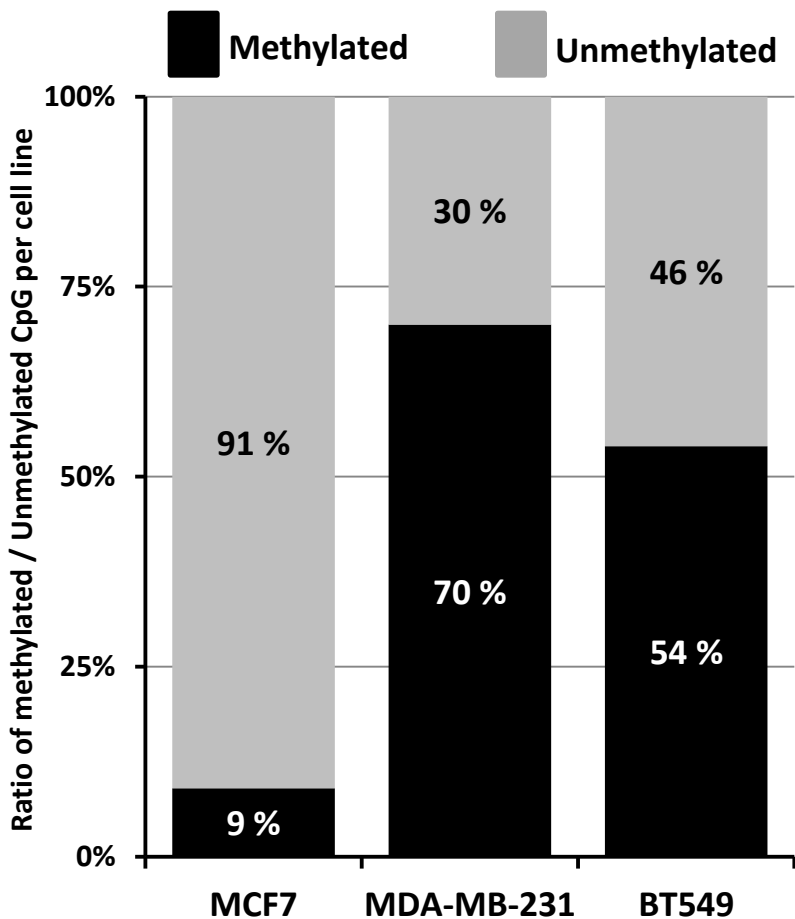

Supplement: MOESM7 [file 9552146]
